# Supplementary material for: Synthesis of α-amino acid derived (1,2,3-triazol-4-yl)-picolinamide (tzpa) ligands and their corresponding luminescent Tb(iii) complexes
Source: Royal Society of Chemistry journal article supplement (doi:10.1039/d3qo00232b), 2023-01-01
Supplement: d3qo00232b1.pdf [file d3qo00232b1.pdf]

## Synthesis of $\alpha$ -amino acid derived (1,2,3-triazol-4-yl)-picolinamide (tzpa) ligands and their corresponding luminescent Tb(III) complexes

Isabel N. Hegarty, Chris S. Hawes, and Thorfinnur Gunnlaugsson

### Electronic Supplementary Information (ESI)

Figures

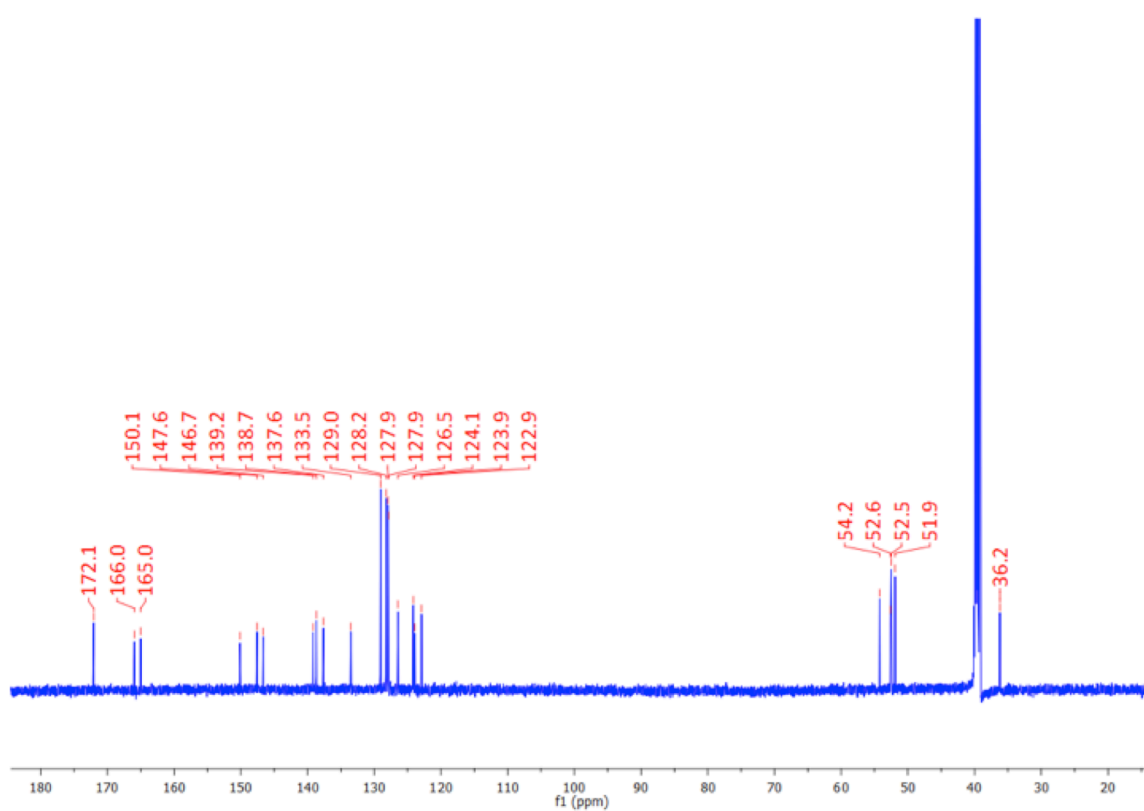

**Figure S1.**  $^{13}\text{C}$  NMR spectrum (150 MHz, DMSO) of **4**.

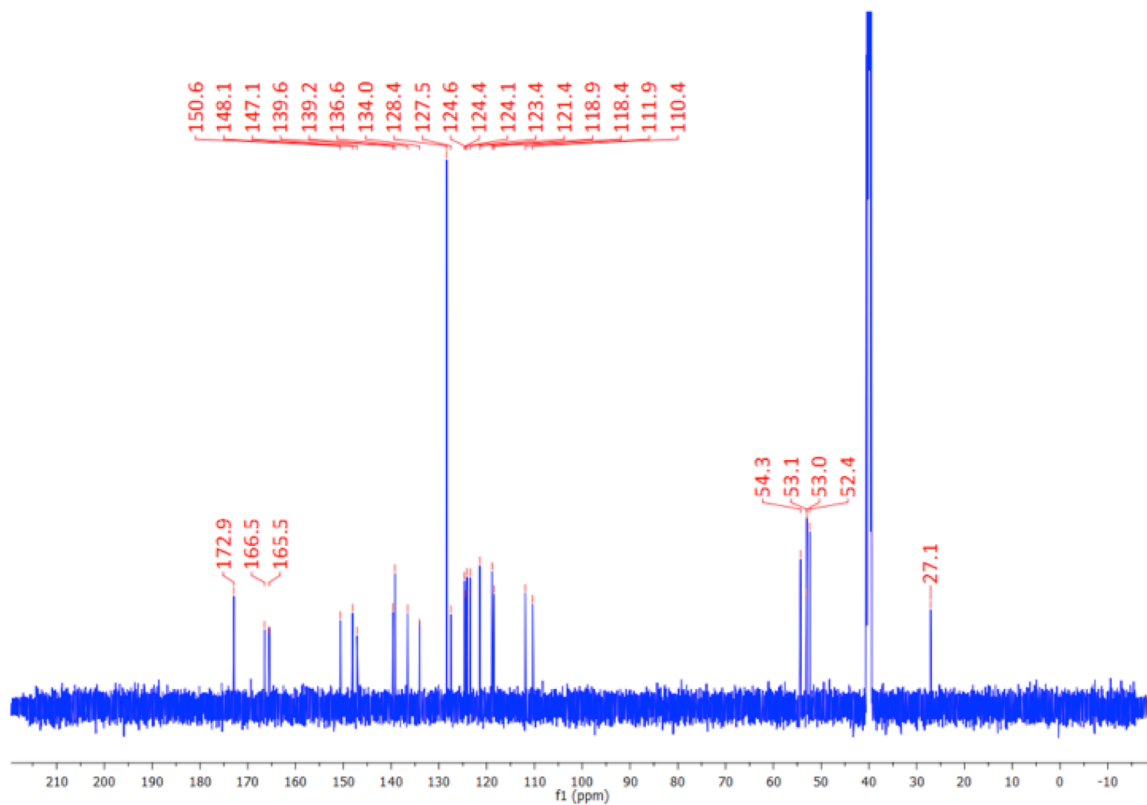

Figure S2.  $^{13}\text{C}$  NMR spectrum (150 MHz, DMSO) of 5.

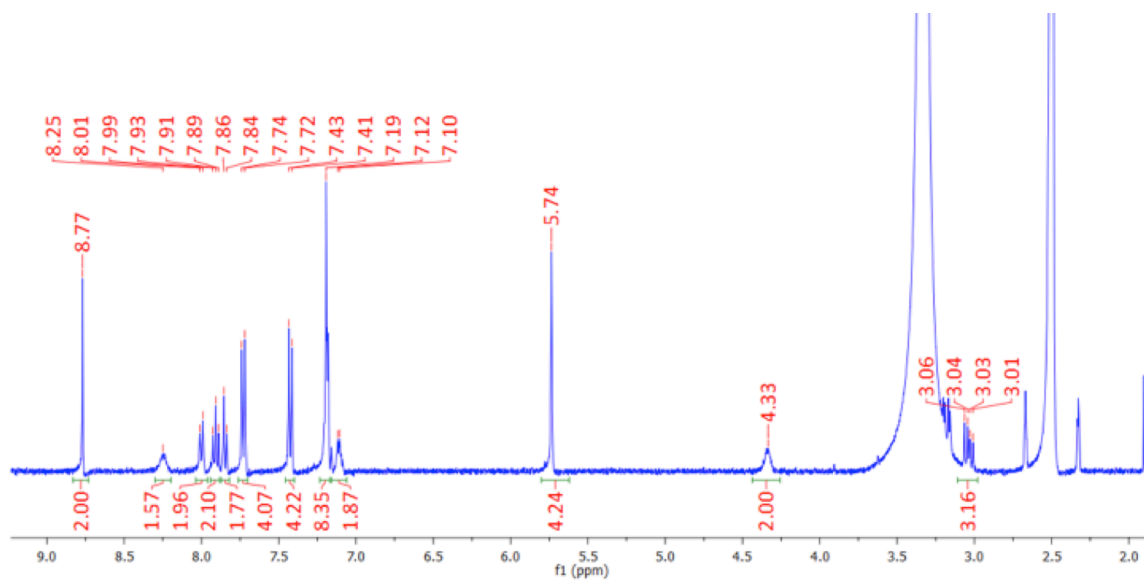

Figure S3.  $^1\text{H}$  NMR spectrum (600 MHz, DMSO) of 6.

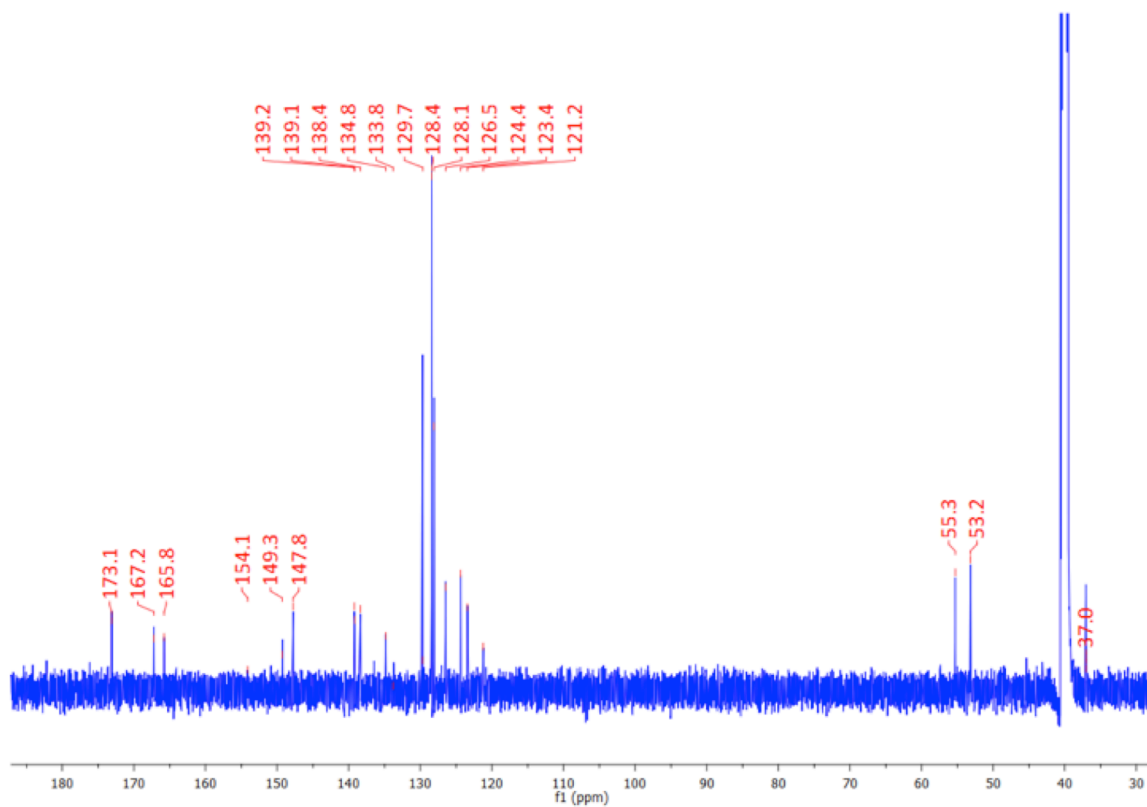

**Figure S4.**  $^{13}\text{C}$  NMR spectrum (150 MHz, DMSO) of **6**.

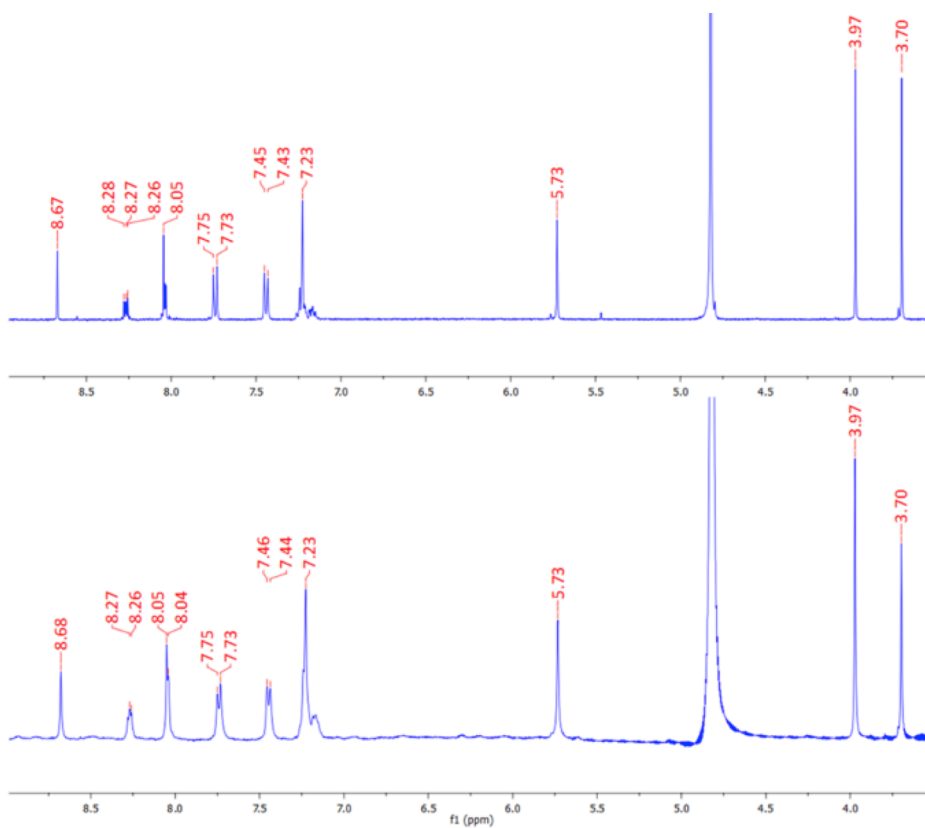

**Figure S5.**  $^1\text{H}$  NMR spectra of (top) **4** and (bottom)  $[\text{Tb}(\mathbf{4})_3]^{3+}$  (400 MHz,  $\text{CD}_3\text{CN}$ ).

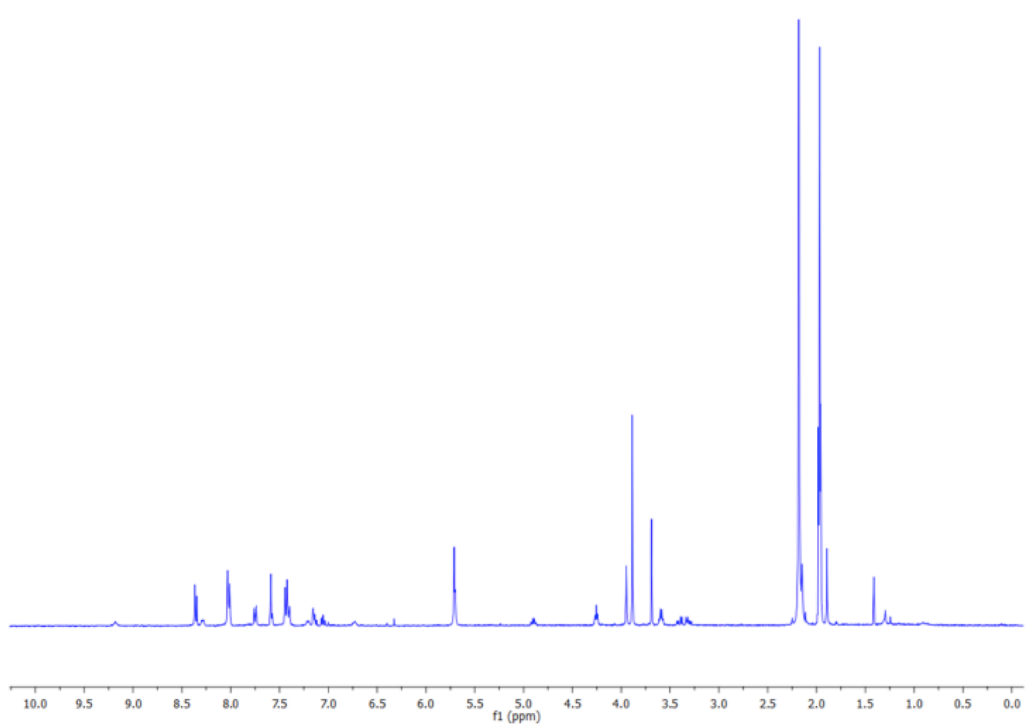

**Figure S6.** <sup>1</sup>H NMR spectrum (400 MHz, CD<sub>3</sub>CN) of Tb.53.

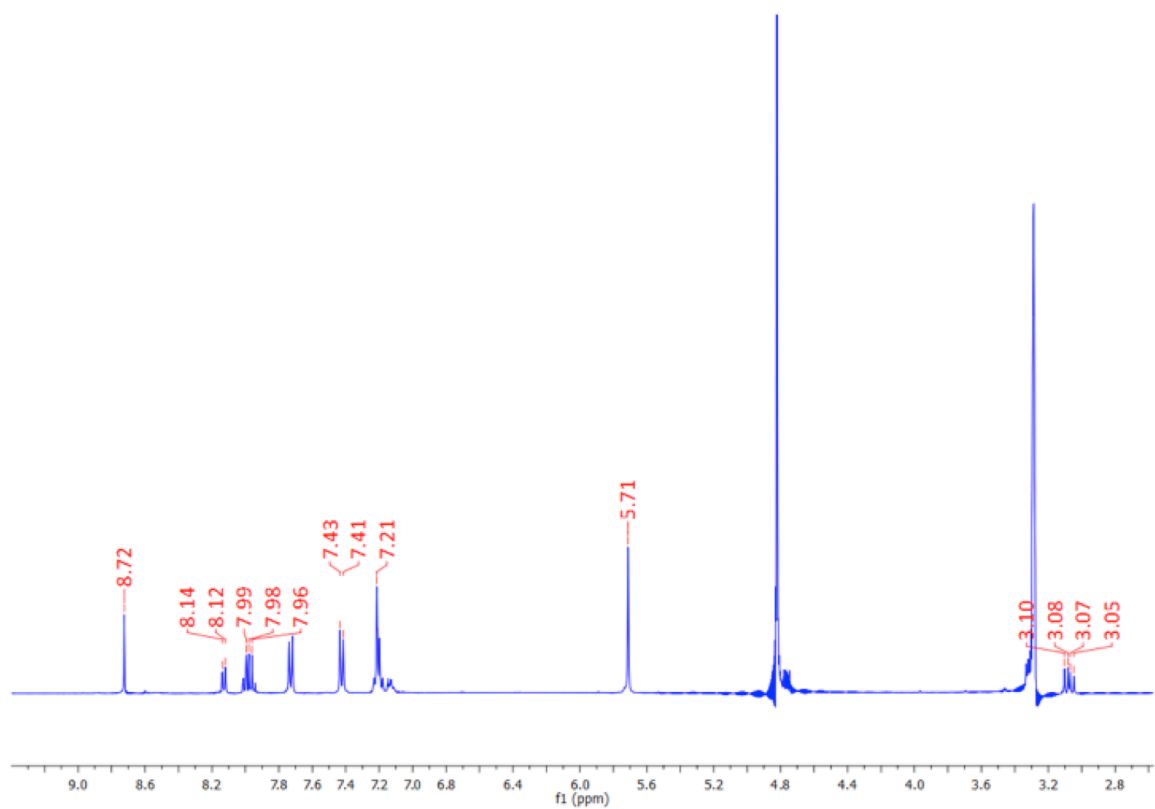

**Figure S7.** <sup>1</sup>H NMR spectrum (400 MHz, CD<sub>3</sub>CN) of Tb.63.

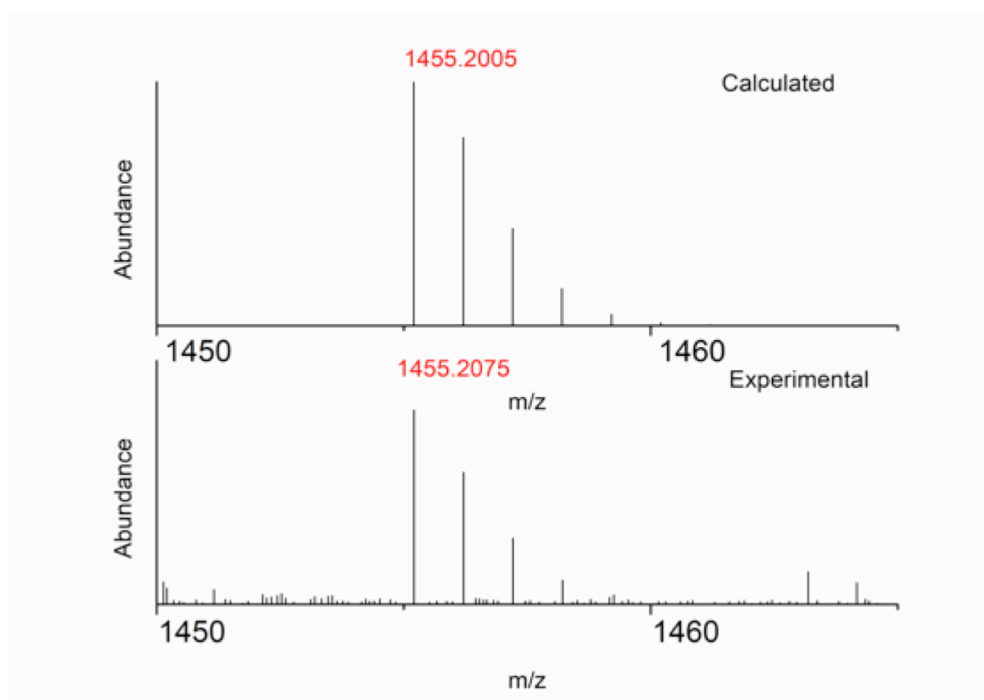

**Figure S8.** The calculated and experimental isotopic distribution patterns for  $Tb.4_2$  showing the 1:2 metal:ligand stoichiometric pattern for a molecular species of the formula  $[Tb(4)_2](CF_3SO_3)_2^+$

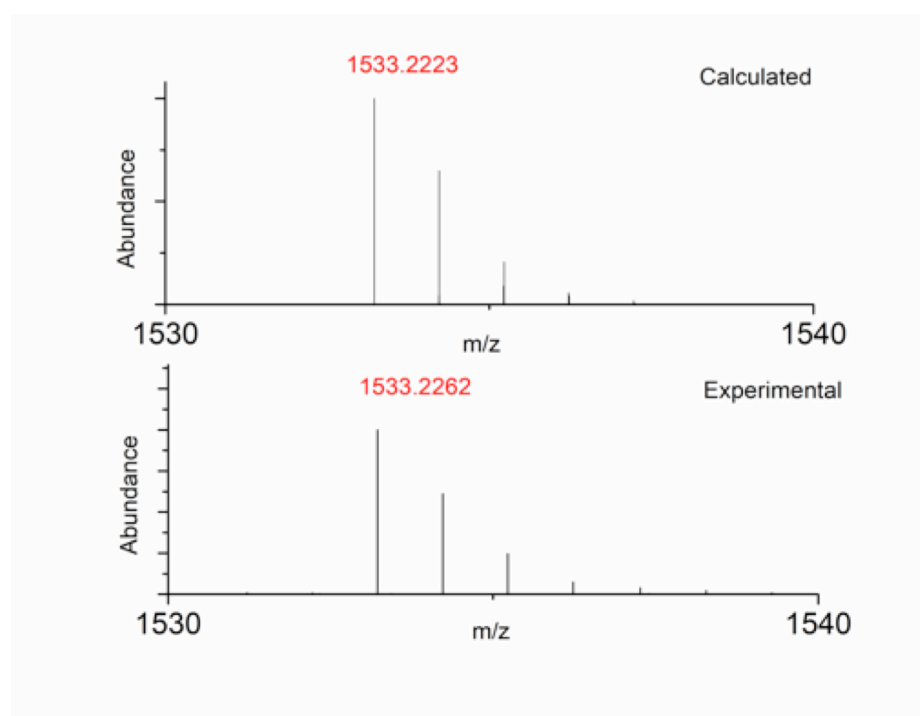

**Figure S9.** The calculated and experimental isotopic distribution patterns for  $Tb.5_2$  showing the 1:2 metal:ligand stoichiometric pattern for a molecular species of the formula  $[Tb(5)_2](CF_3SO_3)_2^+$

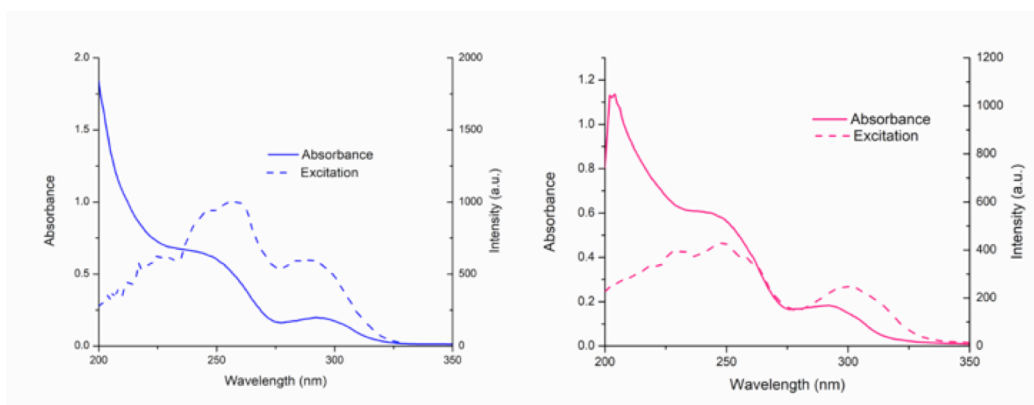

**Figure S10.** (Left) The UV-Vis absorbance and excitation ( $\lambda_{em} = 545 \text{ nm}$ ) spectra of  $[Tb(4)_3]^{3+}$  recorded in  $CH_3CN$  ( $2.7 \times 10^{-5} M$ ), and (Right) of  $[Tb(5)_3]^{3+}$  recorded in  $CH_3CN$  ( $2.5 \times 10^{-5} M$ ).

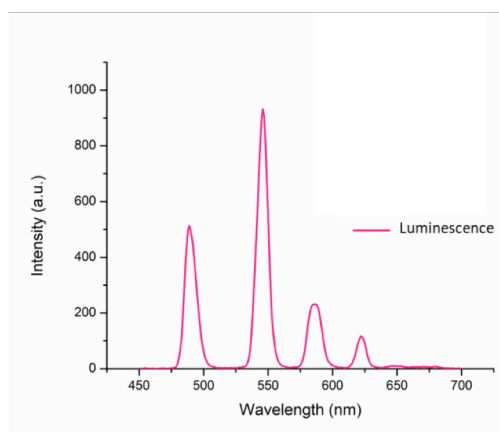

**Figure S11.** Delayed luminescence spectra  $[Tb(5)_3]^{3+}$  ( $2.5 \times 10^{-5} M$ ) recorded in  $CH_3CN$  showing characteristic  $Tb(III)$  transitions  $^5D_4 \rightarrow ^7F_{6,5,4,3,2}$ .

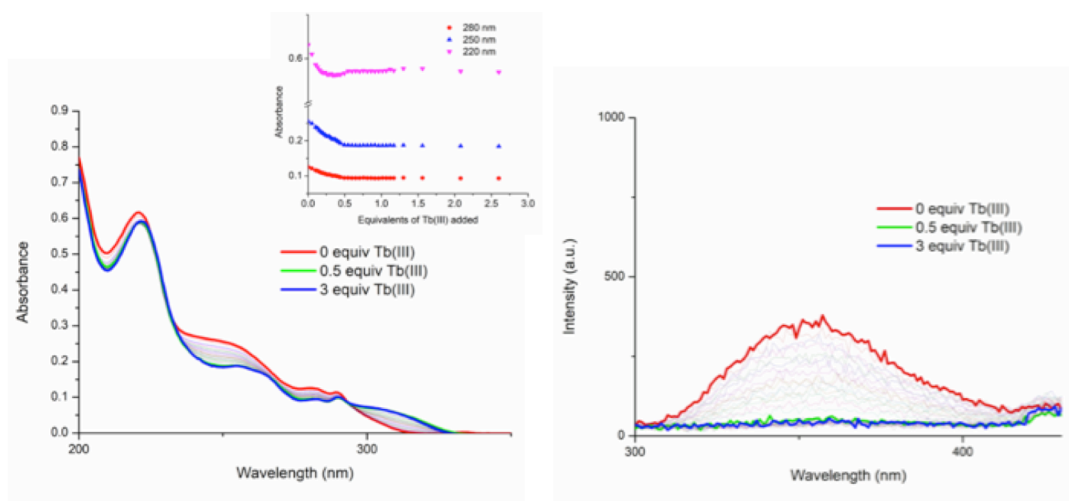

**Figure S12.** The overall changes in the (left) UV-visible absorption spectra and (right) fluorescence emission spectra (excitation wavelength  $\lambda = 230 \text{ nm}$ ) upon titrating **5** ( $1 \times 10^{-5} M$ ) against  $Tb(CF_3SO_3)_3$  ( $0 \rightarrow 3$  equiv.) in  $CH_3CN$  at RT. **Inset:** corresponding experimental binding isotherms of absorbance at  $\lambda = 220, 250$  and  $280 \text{ nm}$ .

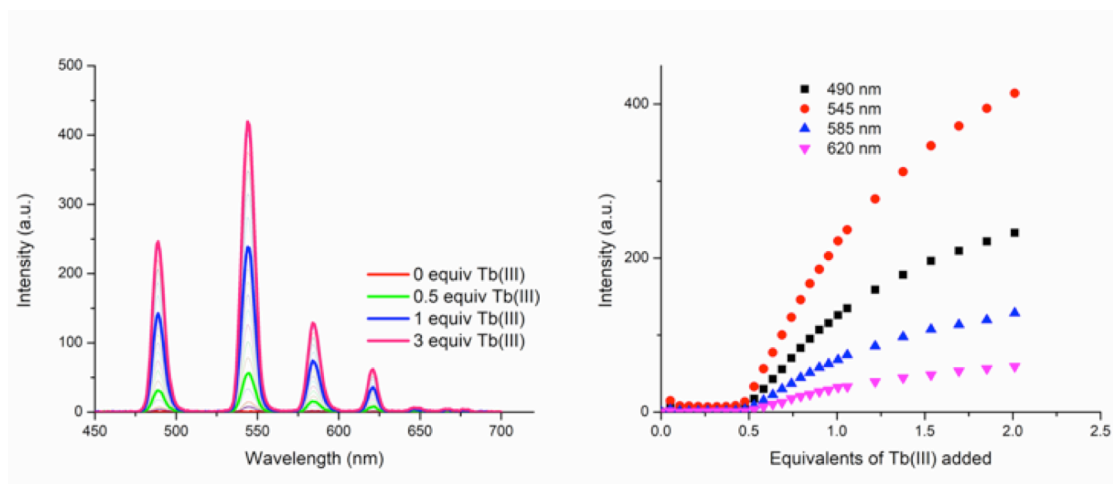

**Figure S13.** (left) The overall changes to the Tb(III)-centred phosphorescence spectra upon titrating **5** ( $1 \times 10^{-5}$  M) against  $\text{Tb}(\text{CF}_3\text{SO}_3)_3$  (0  $\rightarrow$  3 equiv.) in  $\text{CH}_3\text{CN}$  at RT. (right) corresponding experimental binding isotherms of phosphorescence at  $\lambda = 492, 545, 583$  and  $620$  nm.

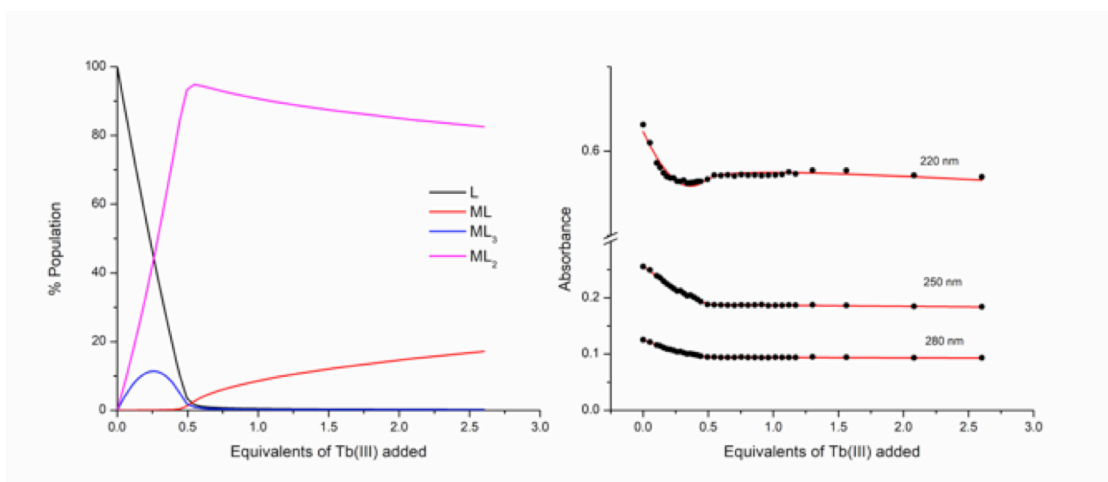

**Figure S14.** The speciation distribution diagram obtained from (Left) the fit of the UV-visible absorption titration data of ligand **5** against  $\text{Tb}(\text{CF}_3\text{SO}_3)_3$  in  $\text{CH}_3\text{CN}$  and (Right) the fit of the experimental binding isotherms using non-linear regression analysis software ReactLab.

**Table S1 Crystal data and structure refinement for 4.**

|                                             |                                                               |
|---------------------------------------------|---------------------------------------------------------------|
| Identification code                         | 4                                                             |
| Empirical formula                           | C <sub>27</sub> H <sub>25</sub> N <sub>5</sub> O <sub>5</sub> |
| Formula weight                              | 499.52                                                        |
| Temperature/K                               | 100(2)                                                        |
| Crystal system                              | monoclinic                                                    |
| Space group                                 | P2 <sub>1</sub>                                               |
| a/Å                                         | 9.9204(3)                                                     |
| b/Å                                         | 9.6670(3)                                                     |
| c/Å                                         | 13.2315(4)                                                    |
| α/°                                         | 90                                                            |
| β/°                                         | 106.3690(10)                                                  |
| γ/°                                         | 90                                                            |
| Volume/Å <sup>3</sup>                       | 1217.47(6)                                                    |
| Z                                           | 2                                                             |
| ρ <sub>calc</sub> /g/cm <sup>3</sup>        | 1.363                                                         |
| μ/mm <sup>-1</sup>                          | 0.793                                                         |
| F(000)                                      | 524.0                                                         |
| Crystal size/mm <sup>3</sup>                | 0.14 × 0.13 × 0.1                                             |
| Radiation                                   | CuKα (λ = 1.54178)                                            |
| 2θ range for data collection/°              | 9.29 to 136.496                                               |
| Index ranges                                | -11 ≤ h ≤ 11, -11 ≤ k ≤ 11, -15 ≤ l ≤ 15                      |
| Reflections collected                       | 12684                                                         |
| Independent reflections                     | 4398 [R <sub>int</sub> = 0.0369, R <sub>sigma</sub> = 0.0383] |
| Data/restraints/parameters                  | 4398/1/336                                                    |
| Goodness-of-fit on F <sup>2</sup>           | 1.021                                                         |
| Final R indexes [I ≥ 2σ (I)]                | R <sub>1</sub> = 0.0275, wR <sub>2</sub> = 0.0716             |
| Final R indexes [all data]                  | R <sub>1</sub> = 0.0281, wR <sub>2</sub> = 0.0722             |
| Largest diff. peak/hole / e Å <sup>-3</sup> | 0.13/-0.14                                                    |
| Flack parameter                             | 0.04(7)                                                       |
| CCDC No.                                    | 2239920                                                       |



## Experimental

### Materials and Methods

Solvents and reagents were purchased from Sigma-Aldrich, Alfa Aesar or TCI Ltd. unless otherwise stated and used without further purification. NMR spectra were recorded using a Bruker AV-600 instrument operating at 600.1 MHz for  $^1\text{H}$  NMR and 150.9 MHz for  $^{13}\text{C}$  NMR. Chemical shifts are reported in commercially available deuterated solvents;  $\delta$  in ppm relative to  $\text{SiMe}_4$  (= 0 ppm) referenced relative to the internal solvent signals. Electrospray mass spectra were determined on a Micromass LCT spectrometer and high resolution mass spectra were determined relative to a standard of leucine enkephaline. Maldi-Q-TOF mass spectra were carried out on a MALDI-Q-TOF-Premier (Waters Corporation, Micromass MS technologies, Manchester, UK) and high-resolution mass spectrometry was performed using Glu-Fib with an internal reference peak of  $m/z$  1570.6774. Infrared spectra were recorded on a Perkin Elmer Spectrum One FT-IR spectrometer equipped with universal ATR sampling accessory. UV-Visible absorption spectra were measured in 1-cm quartz cuvettes on a Varian Cary 50 spectrophotometer, and emission (fluorescence, phosphorescence and excitation) spectra and lifetimes were recorded on a Varian Cary Eclipse Fluorimeter, with samples dissolved in spectrophotometric grade solvents.

### X-ray Crystallography

X-ray data were collected on a Bruker APEX-II DUO diffractometer using microfocus  $\text{Cu K}\alpha$  ( $\lambda = 1.5405 \text{ \AA}$ ) radiation. All data collections were carried out using standard  $\omega$  and  $\phi$  scans at 100 K with temperature control provided by a Cobra cryostream. The data were reduced and multi-scan absorption corrections applied using SADABS[1] within the Bruker APEX3 software suite.[2] Datasets were solved using the intrinsic phasing routine within SHELXT [3] and refined on  $F^2$  using least squares techniques with SHELXL[4] operating within the OLEX-2 GUI.[5] Non-hydrogen atoms were located from their residuals within the Fourier difference map, while hydrogen atoms were either placed in calculated positions with  $U_{\text{iso}}$  dependencies derived from their carrier atoms, or (where appropriate for hydrogen bonding species) were manually located from the Fourier map and restrained with distance restraints and  $U_{\text{iso}}$  dependencies manually. CCDC 2239920.

### References

1. Bruker APEX-3, Bruker-AXS Inc., Madison, WI, 2016.
2. SADABS, Bruker-AXS Inc., Madison, WI, 2016.
3. G. M. Sheldrick, *Acta Crystallogr., Sect. A: Found. Adv.*, 2015, **71**, 3–8.
4. G. M. Sheldrick, *Acta Crystallogr., Sect. C: Struct. Chem.*, 2015, **71**, 3–8.
5. O. V. Dolomanov, L. J. Bourhis, R. J. Gildea, J. A. K. Howard and H. Puschmann, *J. Appl. Crystallogr.*, 2009, **42**, 339–341.
